# Supplementary material for: Diffusion tensor imaging in type 1 diabetes: decreased white matter integrity relates to cognitive functions
Source: PubMed Central journal article supplement (PMC3296003; doi:10.1007/s00125-012-2488-2), 2012-02-11
Supplement: 125_2012_2488_MOESM3_ESM.pdf [file 125_2012_2488_MOESM3_ESM.pdf]

**Table 1.** Demographic, anthropometric and medical variables of T1DM patients with microangiopathy, T1DM patients without microangiopathy, controls.

|                                                | T1DM with<br>microangiopathy | T1DM without<br>microangiopathy | Controls     | <i>p</i> value |
|------------------------------------------------|------------------------------|---------------------------------|--------------|----------------|
| N                                              | 48                           | 52                              | 49           | -              |
| Age (years)                                    | 44.6 ± 7.3                   | 38.1 ± 9.1                      | 36.7 ± 11.2  | <0.001         |
| Sex (m/f)                                      | 19/29                        | 20/32                           | 20/29        | 0.997          |
| Body Mass Index (kg/m <sup>2</sup> )           | 25.6 ± 4.2                   | 24.9 ± 3.5                      | 24.3 ± 3.6   | 0.224          |
| Estimated IQ <sup>a</sup>                      | 110.5 ± 13.5                 | 106.8 ± 11.2                    | 108.5 ± 11.7 | 0.310          |
| Depressive symptoms <sup>b</sup>               | 11.1 ± 9.7                   | 7.0 ± 6.6                       | 6.3 ± 6.7    | 0.005          |
| Systolic blood pressure (mmHg)                 | 134.0 ± 17.0                 | 129.3 ± 15.0                    | 123.6 ± 11.3 | 0.003          |
| Diastolic blood pressure (mmHg)                | 75.9 ± 8.5                   | 77.9 ± 9.4                      | 77.4 ± 7.2   | 0.189          |
| HbA1c (mmol/mol)                               | 65.1 ± 14.4                  | 61.6 ± 9.9                      | 34.2 ± 2.6   | <0.001         |
| HbA1c (%)                                      | 8.1 ± 1.3                    | 7.8 ± 0.9                       | 5.3 ± 0.2    | <0.001         |
| Updated HbA1c <sup>c</sup> (mmol/mol)          | 65.5 ± 12.4                  | 61.3 ± 8.3                      | -            | 0.067          |
| Updated HbA1c <sup>c</sup> (%)                 | 8.1 ± 1.1                    | 7.8 ± 0.8                       | -            | 0.067          |
| Hypertension <sup>d</sup>                      | 31 (64.6)                    | 13 (25.0)                       | -            | <0.001         |
| Albumin-to-creatinine ratio (mg/mmol)          | 3.9 ± 6.5                    | 0.6 ± 0.6                       | -            | <0.001         |
| Blood glucose before MRI (mmol/l)              | 9.2 ± 3.8                    | 10.3 ± 4.6                      | -            | 0.189          |
| Blood glucose before NPA <sup>e</sup> (mmol/l) | 8.7 ± 4.1                    | 8.4 ± 4.1                       | -            | 0.718          |
| Diabetes duration (years)                      | 34.3 ± 7.9                   | 21.7 ± 9.3                      | -            | <0.001         |
| Diabetes onset age (years)                     | 10.3 ± 7.1                   | 16.4 ± 9.6                      | -            | 0.001          |
| Severe hypoglycaemic events <sup>f</sup>       | 6.1 ± 9.3                    | 5.8 ± 10.1                      | -            | 0.872          |
| Neuropathy <sup>g</sup> (%)                    | 25 (52.1)                    | -                               | -            | -              |
| Microalbuminuria <sup>h</sup> (%)              | 14 (29.2)                    | -                               | -            | -              |

Values are given as mean with standard deviation or absolute numbers with percentages between parentheses.

<sup>a</sup> Estimated IQ was measured using the Dutch version of the National Adult Reading Test (NART).

<sup>b</sup> Depressive symptoms were self-reported using the Centre for Epidemiological Studies scale for Depression (CES-D).

<sup>c</sup> Updated HbA1c from the period of 2002 until study date. Median period was 7 years.

<sup>d</sup> Hypertension was defined as a systolic blood pressure of 140 mmHg or above, a diastolic blood pressure of or above 90 mmHg, or the use of antihypertensive medication.

<sup>e</sup> NPA is neuropsychological assessment.

<sup>f</sup> Severe hypoglycaemic events are those events for which a patient needs a third person to recuperate from low blood glucose levels, seizure or coma. These events were self-reported.

<sup>g</sup> Neuropathy was self-reported or, in case of doubt, ascertained by the patients medical record.

<sup>h</sup> Microalbuminuria was defined as an albumin-to-creatinine ratio >2.5 for men and >3.5 for women.
